# Supplementary material for: PET Foams Surface Treated with Graphene Nanoplatelets: Evaluation of Thermal Resistance and Flame Retardancy
Source: MDPI journal article supplement (doi:10.3390/polym13040501), 2021-02-06
Supplement: s1 [file s1]

# PET foams surface treated with graphene nanoplatelets: evaluation of thermal resistance and flame retardancy

Samuele Matta, Laura Giorgia Rizzi and Alberto Frache

Supplementary materials

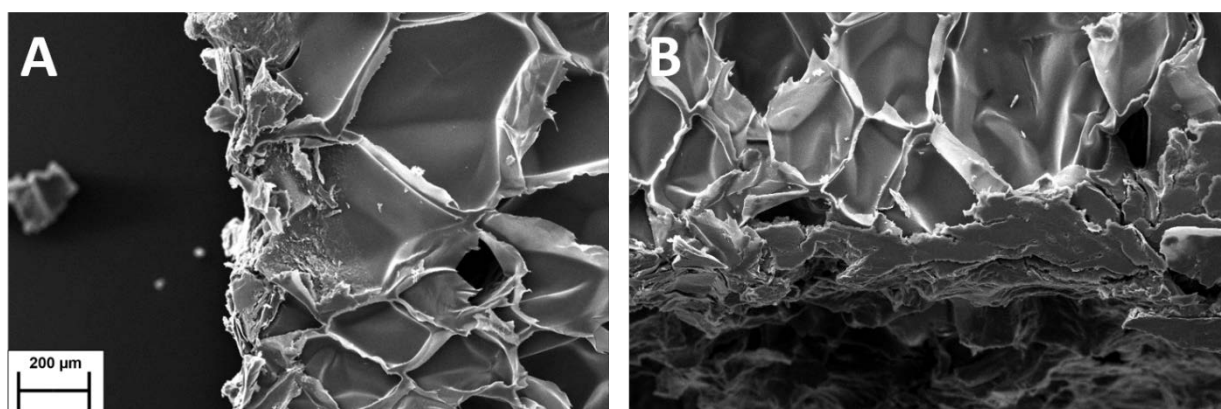

**Figure S1:** SEM images of section fracture of PET foam coated with PSS/GNPs from different angles.

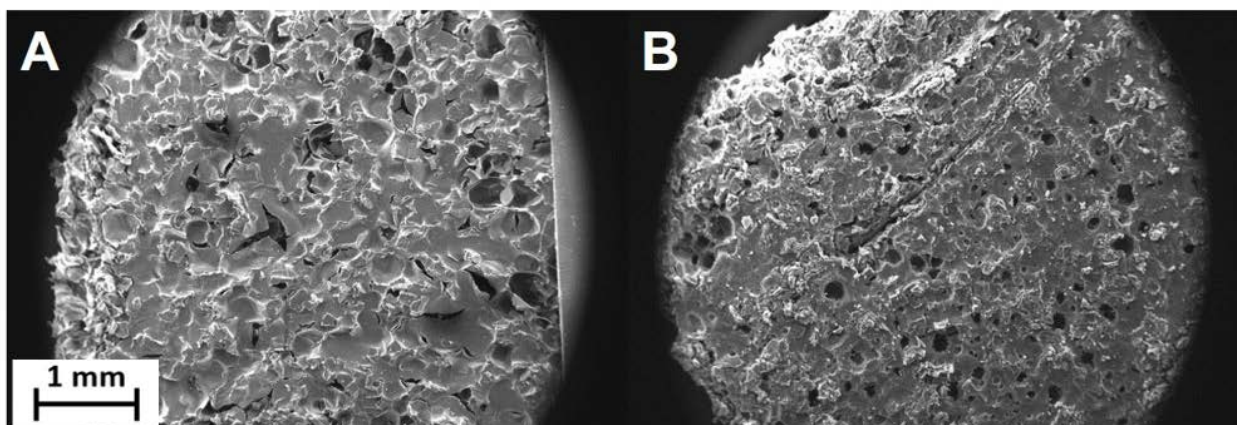

**Figure S2:** SEM images of PET foam treated with DNMS/GNPs coating (A) and with Triton/GNPs coating (B).
